# Supplementary material for: Gas collision for improving the precision and accuracy of11B/10B ratios determination in ICP-QMS and its application to determining wine provenance
Source: Royal Society of Chemistry journal article supplement (doi:10.1039/c6ra05172c), 2016-01-01
Supplement: c6ra05172c1.pdf [file c6ra05172c1.pdf]

# Gas collision for improving the precision and accuracy of $^{11}\text{B}/^{10}\text{B}$ ratios determination in ICP-QMS and its application to determining wine provenance

*Wei Guo, Zhiwei Wu, Shenghong Hu\*, Lanlan Jin, Keyu Qiu, Qinghai Guo and Yiqun Gan*

*State Key Laboratory of Biogeology and Environmental Geology, China University of Geosciences, Wuhan, 430074, P. R. China*

\*Corresponding Author. Tel and Fax: +86-27-67883495

Email address: shhu@cug.edu.cn.

## Electronic Supplementary Information

### 1. Fig S1 $^{10}\text{B}/^{11}\text{B}$ ratios vs detector dead time.

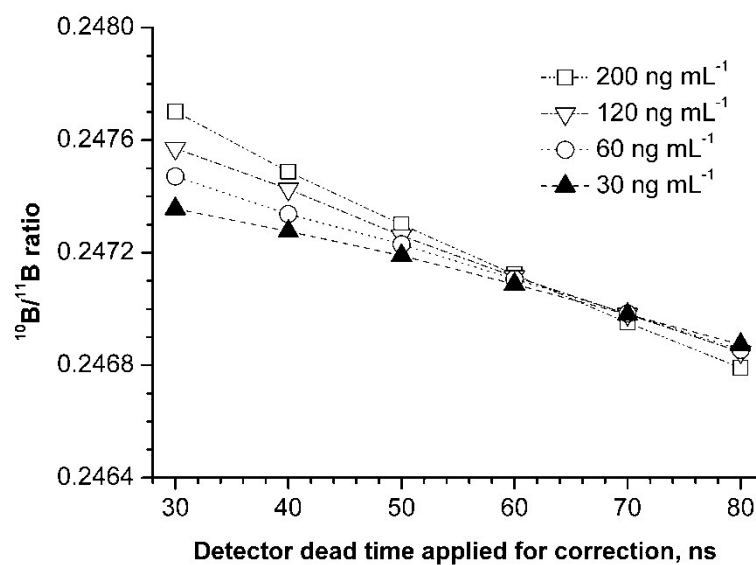

**Fig S1**  $^{10}\text{B}/^{11}\text{B}$  ratios vs detector dead time.
